# Supplementary material for: Characterization and Source Apportionment of PM in Handan—A Case Study during the COVID-19
Source: MDPI journal article supplement (doi:10.3390/atmos14040680), 2023-04-04
Supplement: s1 [file s1]

*Supplementary Material*

# Characterization and Source Apportionment of PM in Handan—A Case Study during the COVID-19

Mushui Shu <sup>1</sup>, Xiaohui Ji <sup>1</sup>, Yu Wang <sup>1,2</sup>, Yan Dou <sup>1</sup>, Pengyao Zhou <sup>1</sup>, Zhizhen Xu <sup>1</sup>, Ling Guo <sup>1</sup>, Mo Dan<sup>1,\*</sup>, Ding Ding <sup>1,3,\*</sup> and Yifei Hu <sup>4</sup>

<sup>1</sup> Institute of Urban Safety and Environmental Science, Beijing Academy of Science and Technology, Xicheng, Beijing 100054, China

<sup>2</sup> Center of Excellence for Environmental Safety and Biological Effects, Beijing Key Laboratory for Green Catalysis and Separation, Department of Chemistry, Beijing University of Technology, Beijing 100124, China

<sup>3</sup> School of Energy and Environmental Engineering, University of Science and Technology Beijing, Beijing 100083, China

<sup>4</sup> Department of Child and Adolescent Health and Maternal Care, School of Public Health, Capital Medical University, Beijing 100069, China

\* Correspondence: dm@bmlp.com (D.M.); d202110092@xs.ustb.edu.cn (D.D.); Tel.: +86-10-83910067 (D.M.); +86-10-83522722 (D.D.)

**Table S1.** The concentrations of PM<sub>2.5</sub>, PM<sub>10</sub> and PM<sub>2.5-10</sub> and their t-test results.

| Sampling Date        | PM <sub>2.5</sub> (µg/m <sup>3</sup> ) |                 | PM <sub>10</sub> (µg/m <sup>3</sup> ) |                 | PM <sub>2.5-10</sub> (µg/m <sup>3</sup> ) |                 |
|----------------------|----------------------------------------|-----------------|---------------------------------------|-----------------|-------------------------------------------|-----------------|
|                      | Sampling site 1                        | Sampling site 2 | Sampling site 1                       | Sampling site 2 | Sampling site 1                           | Sampling site 2 |
| 05.12                | 49                                     | 53              | 183                                   | 206             | 134                                       | 153             |
| 05.13                | 24                                     | 28              | 84                                    | 109             | 60                                        | 81              |
| 05.14                | 69                                     | 64              | 97                                    | 123             | 28                                        | 59              |
| 05.15                | 81                                     | 88              | 147                                   | 183             | 66                                        | 95              |
| 05.16                | 96                                     | 94              | 179                                   | 202             | 83                                        | 108             |
| 05.17                | 26                                     | 33              | 88                                    | 131             | 62                                        | 98              |
| 05.18                | 25                                     | 25              | 70                                    | 85              | 45                                        | 60              |
| Average value        | 53                                     | 55              | 121                                   | 148             | 68                                        | 93              |
| t                    | 1.23                                   |                 | 7.77                                  |                 | 9.04                                      |                 |
| t <sub>0.025,6</sub> | 2.45                                   |                 | 2.45                                  |                 | 2.45                                      |                 |
| P                    | 0.26                                   |                 | 0.0002**                              |                 | 0.0001**                                  |                 |

Note:\*\* indicate a significant correlation.

**Table S2.** The EF of mental elements in two sampling sites.

| Date                                       | EF of PM <sub>2.5</sub> in sampling site 1 |     |        |      |      |     |     |     |     |       |       |
|--------------------------------------------|--------------------------------------------|-----|--------|------|------|-----|-----|-----|-----|-------|-------|
| Element                                    | Al                                         | Ca  | Cd     | Cr   | Cu   | Fe  | K   | Mg  | Mn  | Pb    | Zn    |
| 05.12                                      | 0.9                                        | 1.7 | 609.1  | 1.8  | 2.9  | 1.2 | 2.1 | 1.0 | 2.7 | 78.2  | 78.4  |
| 05.13                                      | 1.1                                        | 4.8 | 297.5  | 60.3 | 2.1  | 1.5 | 4.4 | 2.4 | 3.9 | 91.7  | 86.2  |
| 05.14                                      | 0.7                                        | 1.6 | 1206.1 | 3.8  | 15.7 | 1.6 | 7.4 | 1.0 | 4.8 | 271.2 | 255.6 |
| 05.15                                      | 0.8                                        | 4.2 | 1095.9 | 51.0 | 23.5 | 1.8 | 6.6 | 2.5 | 5.0 | 242.5 | 189.2 |
| 05.16                                      | 0.8                                        | 1.1 | 502.1  | 2.5  | 10.6 | 1.5 | 2.9 | 1.0 | 3.8 | 116.9 | 121.8 |
| 05.17                                      | 1.0                                        | 1.5 | 220.0  | 2.3  | 4.0  | 1.4 | 2.3 | 0.7 | 3.1 | 56.4  | 47.4  |
| 05.18                                      | 1.1                                        | 2.6 | 354.1  | 4.0  | 3.2  | 2.4 | 7.9 | 0.9 | 6.7 | 305.0 | 173.7 |
| EF of PM <sub>2.5</sub> in sampling site 2 |                                            |     |        |      |      |     |     |     |     |       |       |
| Date                                       | Al                                         | Ca  | Cd     | Cr   | Cu   | Fe  | K   | Mg  | Mn  | Pb    | Zn    |
| 05.12                                      | 0.9                                        | 4.5 | 132.5  | 1.5  | 4.9  | 1.9 | 2.4 | 1.0 | 3.1 | 77.0  | 48.8  |
| 05.13                                      | 0.9                                        | 1.5 | 1376.8 | 2.6  | 5.4  | 1.2 | 2.2 | 0.8 | 2.6 | 89.2  | 79.8  |
| 05.14                                      | 1.1                                        | 2.6 | 613.2  | 2.5  | 7.7  | 1.4 | 4.8 | 0.9 | 3.7 | 111.1 | 38.2  |
| 05.15                                      | 0.7                                        | 1.8 | 1422.8 | 4.3  | 14.3 | 1.4 | 7.8 | 1.2 | 4.1 | 306.9 | 186.0 |
| 05.16                                      | 0.9                                        | 2.4 | 1280.0 | 6.5  | 12.7 | 1.8 | 6.9 | 1.4 | 5.2 | 264.1 | 212.0 |
| 05.17                                      | 0.9                                        | 1.4 | 630.4  | 2.5  | 9.9  | 1.5 | 3.0 | 1.0 | 3.7 | 125.9 | 122.9 |
| 05.18                                      | 1.0                                        | 2.1 | 47.4   | 2.2  | 2.3  | 1.4 | 2.2 | 0.8 | 3.1 | 52.1  | 56.5  |
| EF of PM <sub>10</sub> in sampling site 1  |                                            |     |        |      |      |     |     |     |     |       |       |
| Date                                       | Al                                         | Ca  | Cd     | Cr   | Cu   | Fe  | K   | Mg  | Mn  | Pb    | Zn    |
| 05.12                                      | 1.0                                        | 1.5 | 129.4  | 0.7  | 2.8  | 1.1 | 1.4 | 0.6 | 1.7 | 14.7  | 18.0  |
| 05.13                                      | 1.0                                        | 3.6 | 109.2  | 9.6  | 3.0  | 1.2 | 1.8 | 1.1 | 2.1 | 23.5  | 31.5  |
| 05.14                                      | 0.9                                        | 3.9 | 356.0  | 1.5  | 8.1  | 1.3 | 2.6 | 1.0 | 2.3 | 73.3  | 87.4  |
| 05.15                                      | 0.9                                        | 4.3 | 325.8  | 11.7 | 11.0 | 1.5 | 2.5 | 1.2 | 2.5 | 64.5  | 58.2  |
| 05.16                                      | 1.0                                        | 1.7 | 149.8  | 1.2  | 6.2  | 1.2 | 1.7 | 0.8 | 2.1 | 29.9  | 36.8  |
| 05.17                                      | 1.0                                        | 2.6 | 125.0  | 8.4  | 2.9  | 1.2 | 1.6 | 0.9 | 2.0 | 14.0  | 17.3  |
| 05.18                                      | 1.0                                        | 3.8 | 114.1  | 1.8  | 5.1  | 1.9 | 2.6 | 1.1 | 3.1 | 71.1  | 50.1  |
| EF of PM <sub>10</sub> in sampling site 2  |                                            |     |        |      |      |     |     |     |     |       |       |
| Date                                       | Al                                         | Ca  | Cd     | Cr   | Cu   | Fe  | K   | Mg  | Mn  | Pb    | Zn    |
| 05.12                                      | 1.0                                        | 2.0 | 171.2  | 0.8  | 3.2  | 1.1 | 1.5 | 0.7 | 1.8 | 19.1  | 21.7  |
| 05.13                                      | 1.0                                        | 5.0 | 116.3  | 10.1 | 2.4  | 1.1 | 1.7 | 1.2 | 2.2 | 22.2  | 12.5  |

|       |     |     |       |     |     |     |     |     |     |      |      |
|-------|-----|-----|-------|-----|-----|-----|-----|-----|-----|------|------|
| 05.14 | 0.9 | 4.5 | 417.4 | 1.8 | 8.6 | 1.2 | 2.8 | 1.0 | 2.5 | 83.8 | 60.3 |
| 05.15 | 0.9 | 4.5 | 318.1 | 2.1 | 8.1 | 1.3 | 2.3 | 1.0 | 2.5 | 60.0 | 55.4 |
| 05.16 | 0.9 | 2.5 | 211.8 | 6.5 | 6.2 | 1.2 | 1.6 | 0.9 | 2.1 | 31.5 | 39.3 |
| 05.17 | 1.0 | 3.3 | 60.0  | 1.1 | 2.9 | 1.2 | 1.6 | 0.8 | 2.2 | 16.0 | 21.4 |

**Table S3.** Concentration and proportion of PM components.

| Grouping                              | Sampling site     |                  | Sampling site     |                  | Grouping                                                    | Sampling site     |                  | Sampling site     |                  |
|---------------------------------------|-------------------|------------------|-------------------|------------------|-------------------------------------------------------------|-------------------|------------------|-------------------|------------------|
|                                       | 1                 |                  | 2                 |                  |                                                             | 1                 |                  | 2                 |                  |
|                                       | PM <sub>2.5</sub> | PM <sub>10</sub> | PM <sub>2.5</sub> | PM <sub>10</sub> |                                                             | PM <sub>2.5</sub> | PM <sub>10</sub> | PM <sub>2.5</sub> | PM <sub>10</sub> |
| <b>PM (μg/m<sup>3</sup>)</b>          | 53                | 121              | 55                | 148              | PM (μg/m <sup>3</sup> )                                     | 53                | 121              | 55                | 148              |
| OC (μg/m <sup>3</sup> )               | 5.7               | 9.2              | 6.5               | 10.7             | Cl <sup>-</sup> (μg/m <sup>3</sup> )                        | 0.7               | 1.1              | 0.3               | 0.7              |
| EC (μg/m <sup>3</sup> )               | 1.8               | 4.0              | 2.0               | 4.6              | NO <sub>3</sub> <sup>-</sup> (μg/m <sup>3</sup> )           | 9.2               | 12.2             | 8.7               | 12.8             |
| TC (μg/m <sup>3</sup> )               | 7.5               | 13.3             | 8.5               | 15.3             | SO <sub>4</sub> <sup>2-</sup> (μg/m <sup>3</sup> )          | 7.5               | 8.0              | 7.5               | 8.8              |
| OC/EC                                 | 3.18              | 2.29             | 3.29              | 2.34             | Na <sup>+</sup> (μg/m <sup>3</sup> )                        | 0.4               | 0.5              | 0.3               | 0.5              |
| OC/TC%                                | 76.1              | 69.9             | 76.7              | 70.0             | NH <sub>4</sub> <sup>+</sup> (μg/m <sup>3</sup> )           | 5.7               | 5.4              | 5.4               | 4.8              |
| EC/TC%                                | 23.9              | 30.4             | 23.3              | 30.0             | K <sup>+</sup> (μg/m <sup>3</sup> )                         | 0.6               | 0.6              | 0.8               | 0.7              |
| OC/PM%                                | 10.8              | 7.6              | 11.8              | 7.2              | Mg <sup>2+</sup> (μg/m <sup>3</sup> )                       | 0.0               | 0.2              | 0.0               | 0.2              |
| EC/PM%                                | 3.4               | 3.3              | 3.6               | 3.1              | Ca <sup>2+</sup> (μg/m <sup>3</sup> )                       | 0.6               | 4.1              | 0.9               | 6.3              |
| OC <sub>2.5</sub> /OC <sub>10</sub> % | 62.1              |                  | 60.7              |                  | q(TWSI) (μg/m <sup>3</sup> )                                | 24.8              | 32.1             | 24.0              | 34.8             |
| EC <sub>2.5</sub> /EC <sub>10</sub> % | 44.8              |                  | 43.1              |                  | q(TWSI)/q(PM)<br>%                                          | 46.8              | 26.5             | 43.6              | 23.5             |
| Al (μg/m <sup>3</sup> )               | 0.62              | 3.58             | 0.69              | 3.97             | q(SNA) (μg/m <sup>3</sup> )                                 | 22.4              | 25.7             | 21.6              | 26.4             |
| Ca (μg/m <sup>3</sup> )               | 0.74              | 4.66             | 0.71              | 6.59             | q(SNA)/q(TWSI)<br>%                                         | 90.3              | 80.1             | 90.0              | 75.9             |
| Fe (μg/m <sup>3</sup> )               | 0.58              | 2.52             | 0.63              | 2.73             | NO <sub>3</sub> <sup>-</sup> /SO <sub>4</sub> <sup>2-</sup> | 1.2               | 1.5              | 1.2               | 1.5              |
| K (μg/m <sup>3</sup> )                | 0.77              | 1.84             | 0.86              | 2.00             | SOR                                                         | 0.3               | 0.4              | 0.3               | 0.4              |
| Mg (μg/m <sup>3</sup> )               | 0.24              | 0.90             | 0.20              | 1.03             | NOR                                                         | 0.3               | 0.3              | 0.3               | 0.3              |
| Mn (μg/m <sup>3</sup> )               | 0.02              | 0.07             | 0.03              | 0.08             | AE                                                          | 0.32              | 0.39             | 0.31              | 0.41             |
| Pb (μg/m <sup>3</sup> )               | 0.02              | 0.02             | 0.02              | 0.03             | CE                                                          | 0.77              | 1.04             | 0.67              | 1.12             |
| Ti (μg/m <sup>3</sup> )               | 0.03              | 0.18             | 0.04              | 0.21             | AE/CE                                                       | 0.42              | 0.38             | 0.46              | 0.37             |
| Zn (μg/m <sup>3</sup> )               | 0.07              | 0.11             | 0.07              | 0.11             |                                                             |                   |                  |                   |                  |

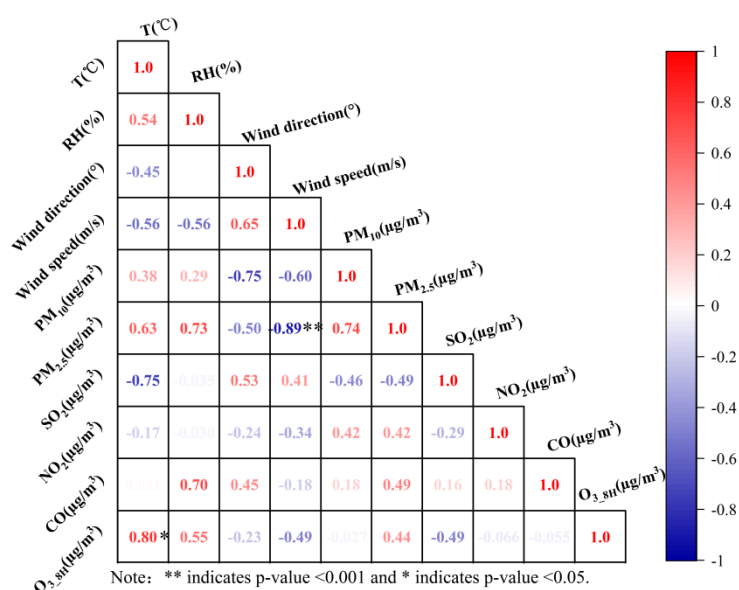

**Figure S1.** Correlation analysis between pollutants and meteorological factors.

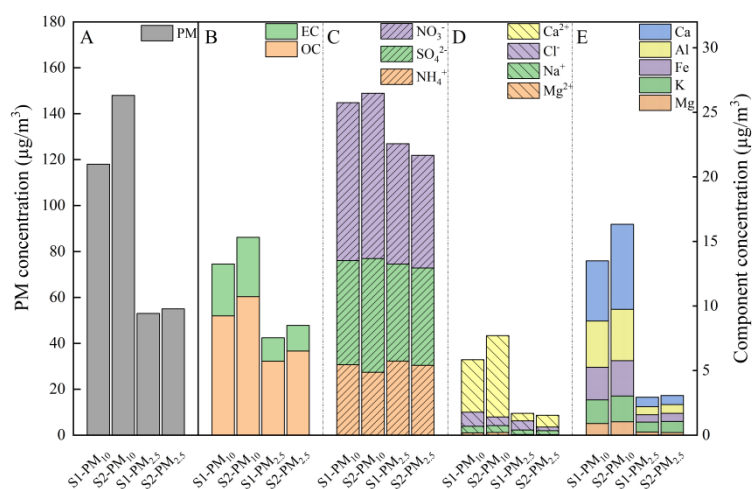

**Figure S2.** The PM mass concentration (A), OC/EC (B), Sulfate-Nitrate-Ammonium (SNA) (C), Water-Soluble Ion (D), Metal Element (E) concentration in PM (S1-PM<sub>10</sub> and S2-PM<sub>10</sub> indicate PM<sub>10</sub> for sample sites 1 and 2, respectively; S1-PM<sub>2.5</sub> and S2-PM<sub>10</sub> indicate PM<sub>2.5</sub> for sample sites 1 and 2, respectively).

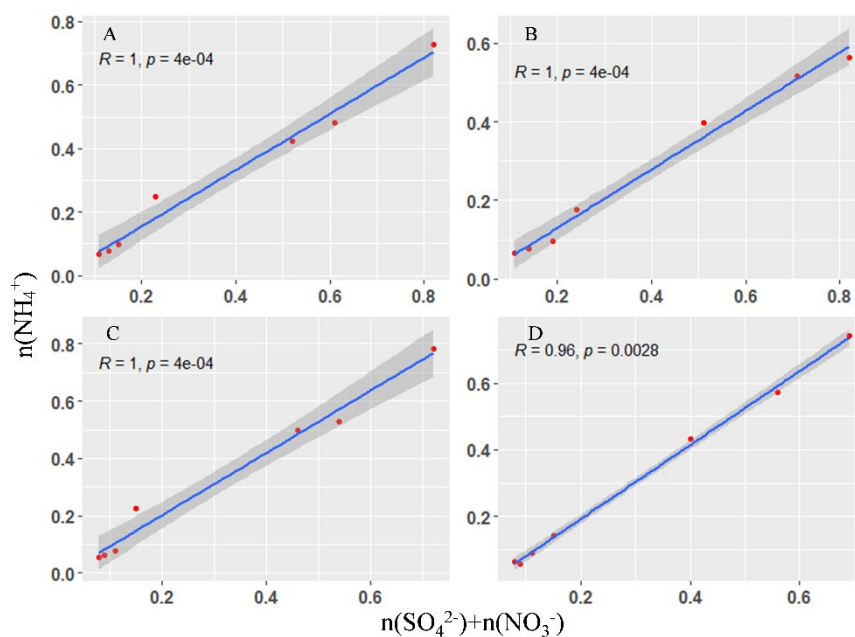

**Figure S3.** Molar mass relationship between  $n(\text{NH}_4^+)$  and  $n(\text{SO}_4^{2-}) + n(\text{NO}_3^-)$  in PM. (A: the PM<sub>10</sub> of sample site 1, B: the PM<sub>10</sub> of sample site 2, C: the PM<sub>2.5</sub> of sample site 1, D: the PM<sub>2.5</sub> of sample site 2).

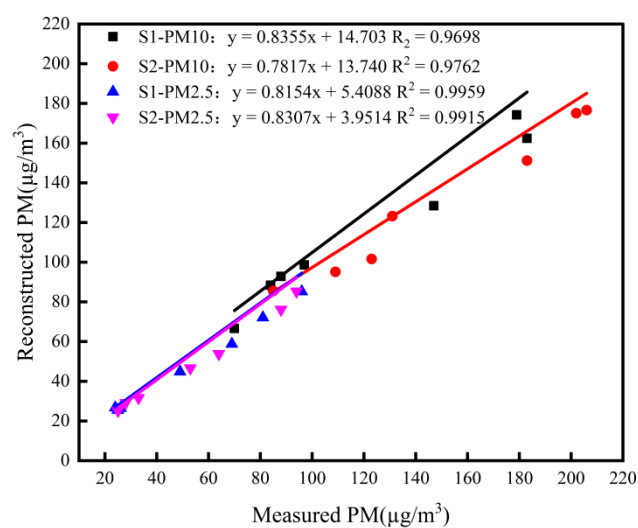

**Figure S4.** Correlation between the reconstructed and measured PM mass concentration (S1-PM<sub>10</sub> and S2-PM<sub>10</sub> indicate PM<sub>10</sub> for sample sites 1 and 2, respectively; S1-PM<sub>2.5</sub> and S2-PM<sub>10</sub> indicate PM<sub>2.5</sub> for sample sites 1 and 2, respectively).

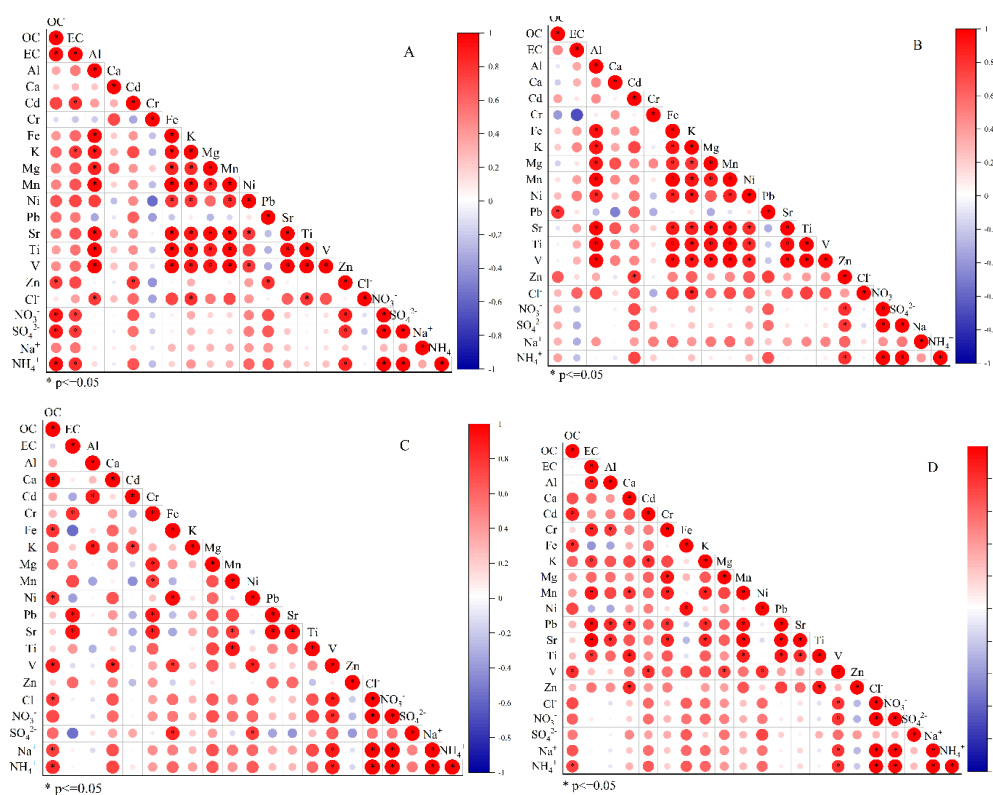

**Figure S5.** The correlations between the components of PM<sub>2.5</sub> and PM<sub>10</sub> (A: the PM<sub>10</sub> of sample site 1, B: the PM<sub>10</sub> of sample site 2, C: the PM<sub>2.5</sub> of sample site 1, D: the PM<sub>2.5</sub> of sample site 2).

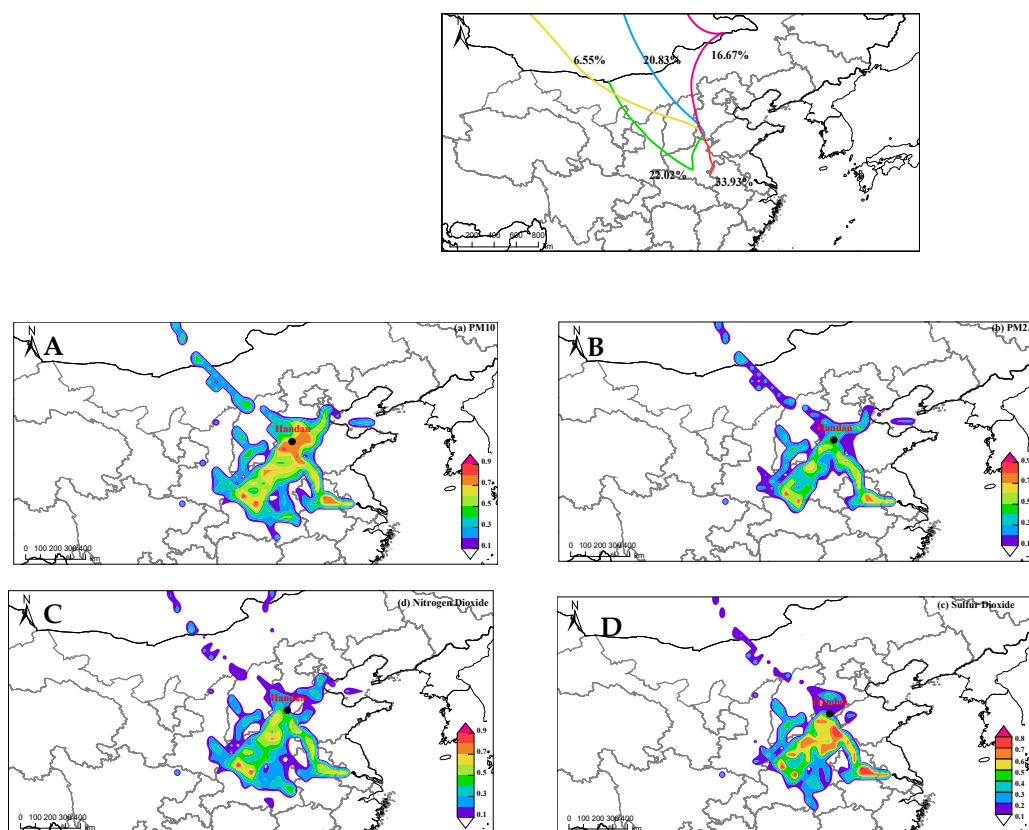

**Figure S6.** The 48-h backward trajectory and the PSCF analysis based on (A) PM<sub>10</sub>, (B) PM<sub>2.5</sub>, (C) SO<sub>2</sub>, (D) NO<sub>2</sub> concentration.

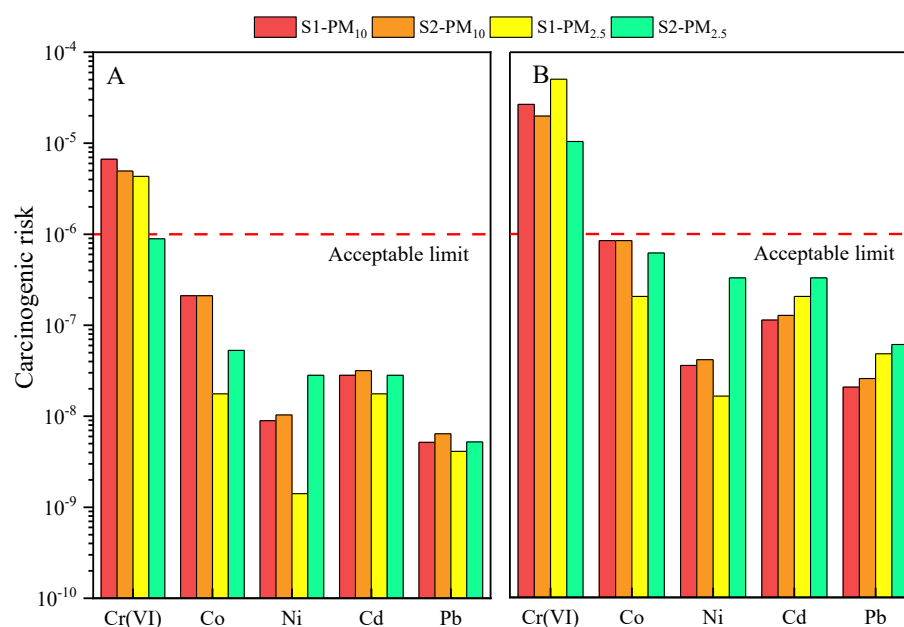

**Figure S7.** The contribution of different elements to carcinogenic risk (S1-PM<sub>10</sub> and S2-PM<sub>10</sub> indicate PM<sub>10</sub> for sample sites 1 and 2, respectively; S1-PM<sub>2.5</sub> and S2-PM<sub>10</sub> indicate PM<sub>2.5</sub> for sample sites 1 and 2, respectively).
